# Supplementary material for: Heterogenous hydrogel mimicking the osteochondral ECM applied to tissue regeneration
Source: Royal Society of Chemistry journal article supplement (doi:10.1039/d1tb00518a), 2021-01-01
Supplement: d1tb00518a1.pdf [file d1tb00518a1.pdf]

## Supporting Information

### Heterogenous hydrogel mimicking the osteochondral ECM applicable to tissue regeneration

Zhuoxin Chen,<sup>a,1</sup> Hong Xiao,<sup>b,1</sup> Hongbo Zhang,<sup>a</sup> Qiangwei Xin,<sup>a</sup> Haochen Zhang,<sup>a</sup>  
Haixin Liu,<sup>c</sup> Mingzhen Wu,<sup>a</sup> Liangrui Zuo,<sup>a</sup> Jun Luo,<sup>a</sup> Qiang Guo,<sup>d</sup> Chunmei Ding,<sup>a,e\*</sup>  
Hong Tan,<sup>a</sup> Jianshu Li<sup>a,d,f,\*</sup>

<sup>a</sup> College of Polymer Science and Engineering, State Key Laboratory of Polymer  
Materials Engineering, Sichuan University, Chengdu 610065, China.

<sup>b</sup> Department of Pain Management, West China Hospital, Sichuan University, No. 37,  
GuoXue Xiang, Chengdu 610041, China.

<sup>c</sup> Department of Orthopedics, People's Hospital of Deyang City, No.173, Taishan  
North Road, Deyang 618000, China

<sup>d</sup> State Key Laboratory of Oral Diseases, West China Hospital of Stomatology,  
Sichuan University, Chengdu 610041, China.

<sup>e</sup> CAS Key Laboratory of Bio-inspired Materials and Interfacial Science, Technical  
Institute of Physics and Chemistry, Beijing 100190, China

<sup>f</sup> Med-X Center for Materials, Sichuan University, 610041, China.

<sup>1</sup> Zhuoxin Chen and Hong Xiao contributed equally to this work.

#### \*Corresponding Author:

E-mail address: [dingcm@scu.edu.cn](mailto:dingcm@scu.edu.cn) (C. D.), [jianshu\\_li@scu.edu.cn](mailto:jianshu_li@scu.edu.cn) (J. L.)

|                |                |               |               |                    |                |                            |                 |
|----------------|----------------|---------------|---------------|--------------------|----------------|----------------------------|-----------------|
| MC3T3<br>cells | Group          | AAm<br>(wt.%) | VPA<br>(wt.%) | Alginate<br>(wt.%) | MBAA<br>(wt.%) | Iragcure<br>2959<br>(wt.%) | Mineral<br>ized |
|                | pAAm           | 15            | 0             | 1                  | 1              | 0.5                        | No              |
|                | pAAm-VPA       | 13.5          | 1.5           | 1                  | 1              | 0.5                        | No              |
|                | pAAm-VPA<br>@M | 13.5          | 1.5           | 1                  | 1              | 0.5                        | Yes             |

  

|                  |           |                 |               |                 |                           |                         |
|------------------|-----------|-----------------|---------------|-----------------|---------------------------|-------------------------|
| chondro<br>cytes | Group     | GelMA<br>(wt.%) | AGA<br>(wt.%) | PEGDA<br>(wt.%) | CaCl <sub>2</sub><br>(mM) | Iragcure 2959<br>(wt.%) |
|                  | PEGDA     | 0               | 0             | 15              | 100                       | 0.5                     |
|                  | GelMA     | 15              | 0             | 0               | 100                       | 0.5                     |
|                  | GelMA-AGA | 14              | 1             | 0               | 100                       | 0.5                     |

**Table S1.** Formulas for *in vitro* cell study.

| <b>Gene</b>    | <b>Primer sequences</b> |
|----------------|-------------------------|
| GAP-Forward    | TTCAACGGCACAGTCAAG      |
| GAP-Reverse    | TACTCAGCACCCAGCATCA     |
| OCN-Forward    | GCAGTAAGGTGGTGAATAGA    |
| OCN-Reverse    | AACGGTGGTGCCATAGAT      |
| COL1a1-Forward | CGAGTATGGAAGCGAAGG      |
| COL1a1-Reverse | GCAGTGATAGGTGATGTTCT    |
| Runx2-Forward  | CTTCGTCAGCGTCCTATC      |
| Runx2-Reverse  | CTTCATCAGCGTCAACA       |
| ACAN-Forward   | CGAGTGAACAGCATCTACC     |
| ACAN-Reverse   | GAGTCATTGGAGCGAAGG      |
| COL2a1-Forward | CAGCAAGAGCAAGGAGAA      |
| COL2a1-Reverse | GGACAGTAGACGGAGGAA      |
| SOX9-Forward   | CCAGAGAACGCACATCAA      |
| SOX9-Reverse   | GTGGTCGGTGTAGTCATAC     |

**Table S2.** The sequences of primers used for real-time PCR

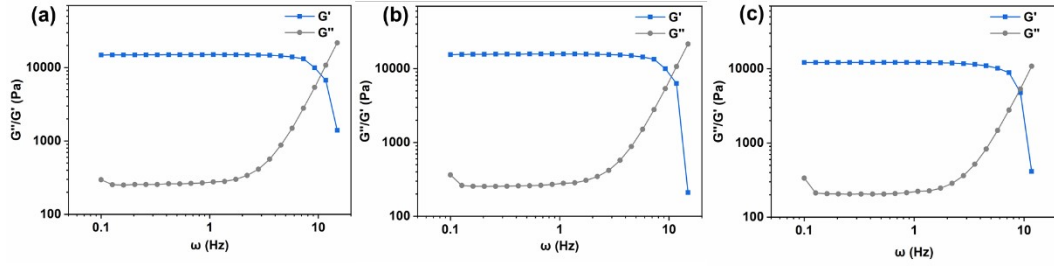

**Figure S1.** Frequency sweep for double layer hydrogel when the bottom layer was pre-irradiated for a) 3 min, b) 5 min and c) 7 min respectively

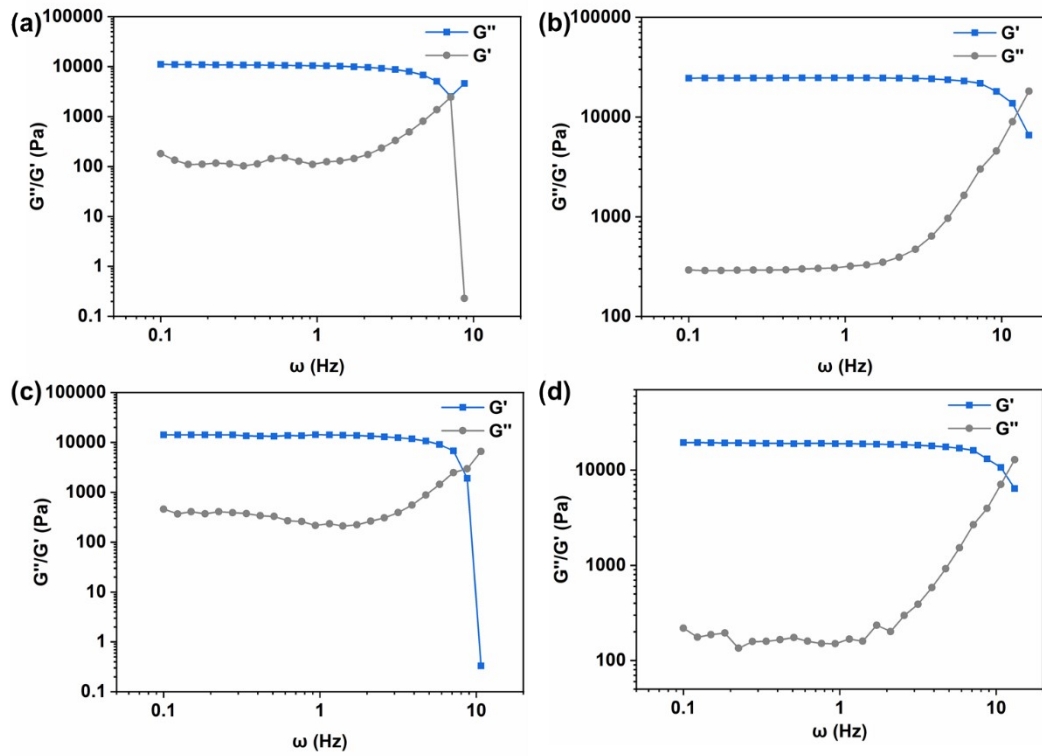

**Figure S2.** Frequency sweep for a) upper, b) bottom, c) double layer hydrogel without chelation, d) double layer hydrogel after mineralization respectively.

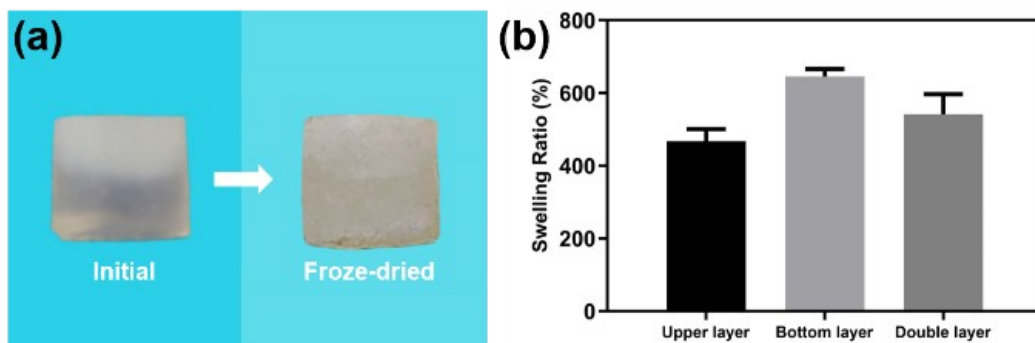

**Figure S3.** (a) Photographs of native bilayer hydrogel and lyophilized hydrogel. (b) Swelling ratio of single and double layer hydrogels (n=4).

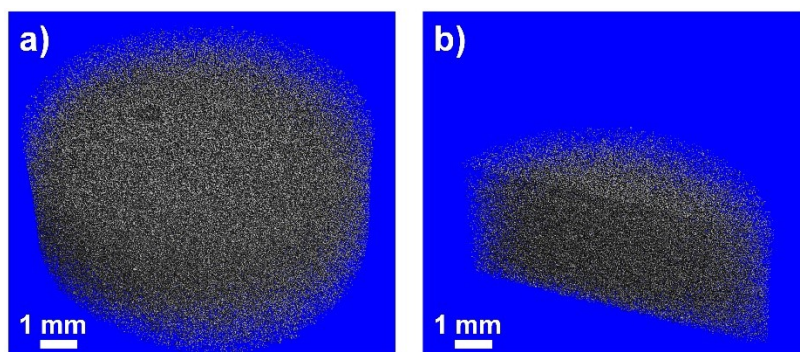

**Figure S4.** 3D reconstruction of hydrogel showing the pore interconnectivity.

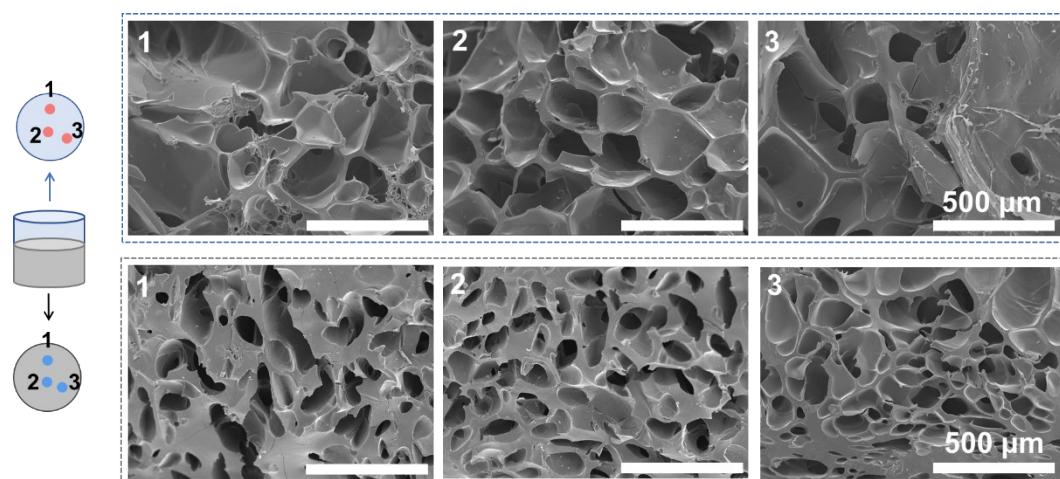

**Figure S5.** SEM images of double layer hydrogel of different sites, which illustrates the porosity of hydrogel.

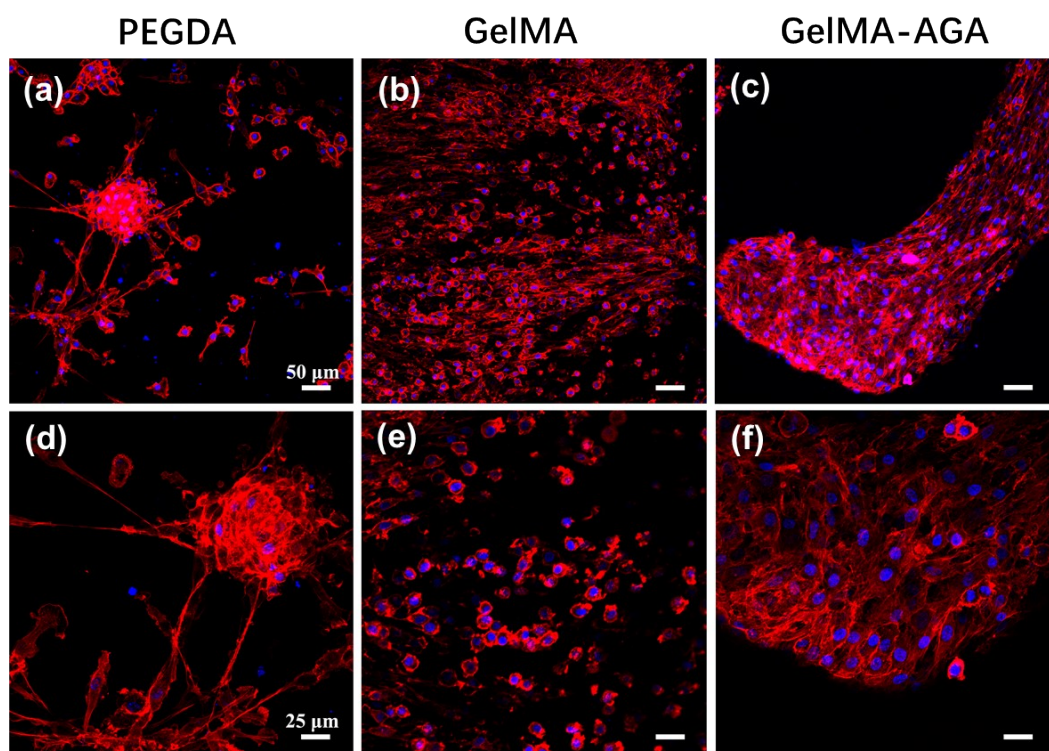

**Figure S6.** Fluorescence microscopic images of chondrocytes cultured on upper layer hydrogels for 7 days. Scale bar: 50  $\mu\text{m}$  and 25  $\mu\text{m}$ .

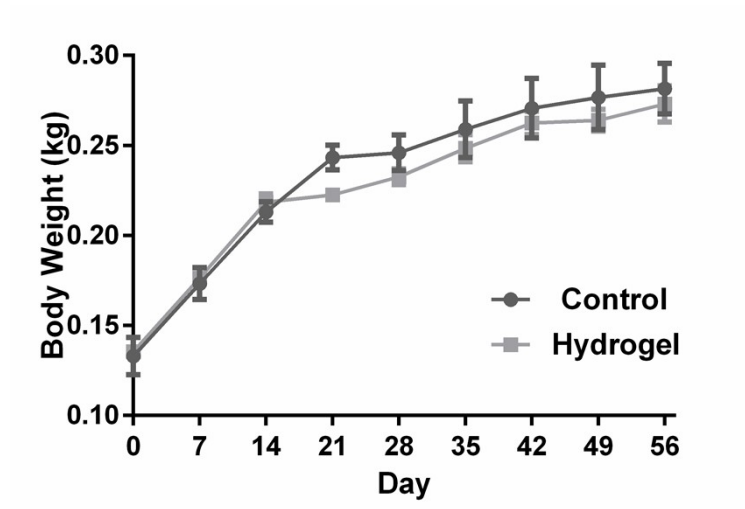

**Figure S7.** Body weight of SD rats in different groups post-surgery (n=3).

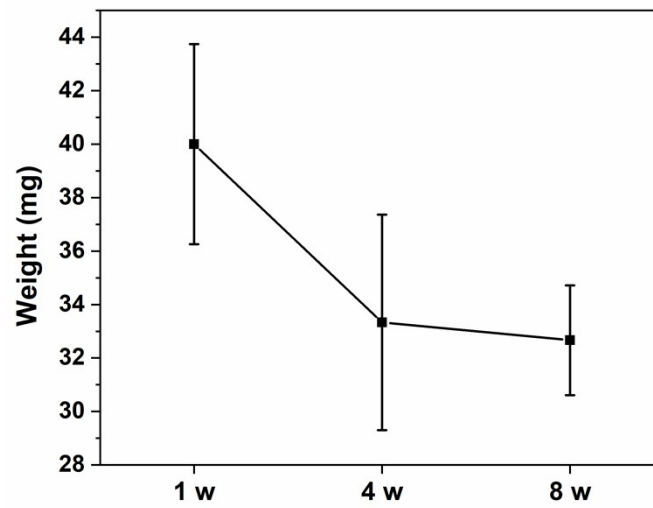

**Figure S8.** The weight of hydrogel at implantation of 1, 4, and 8 weeks

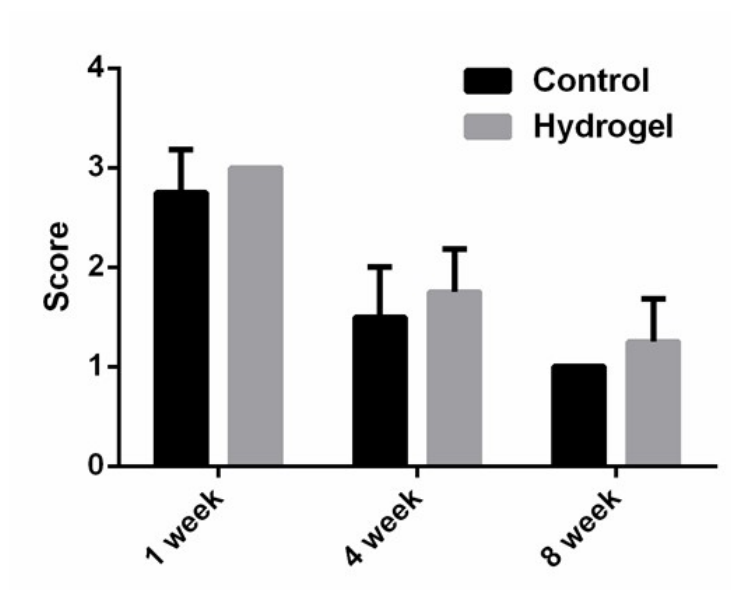

**Figure S9.** Score of HE stains in subcutaneous tissue (n=3).

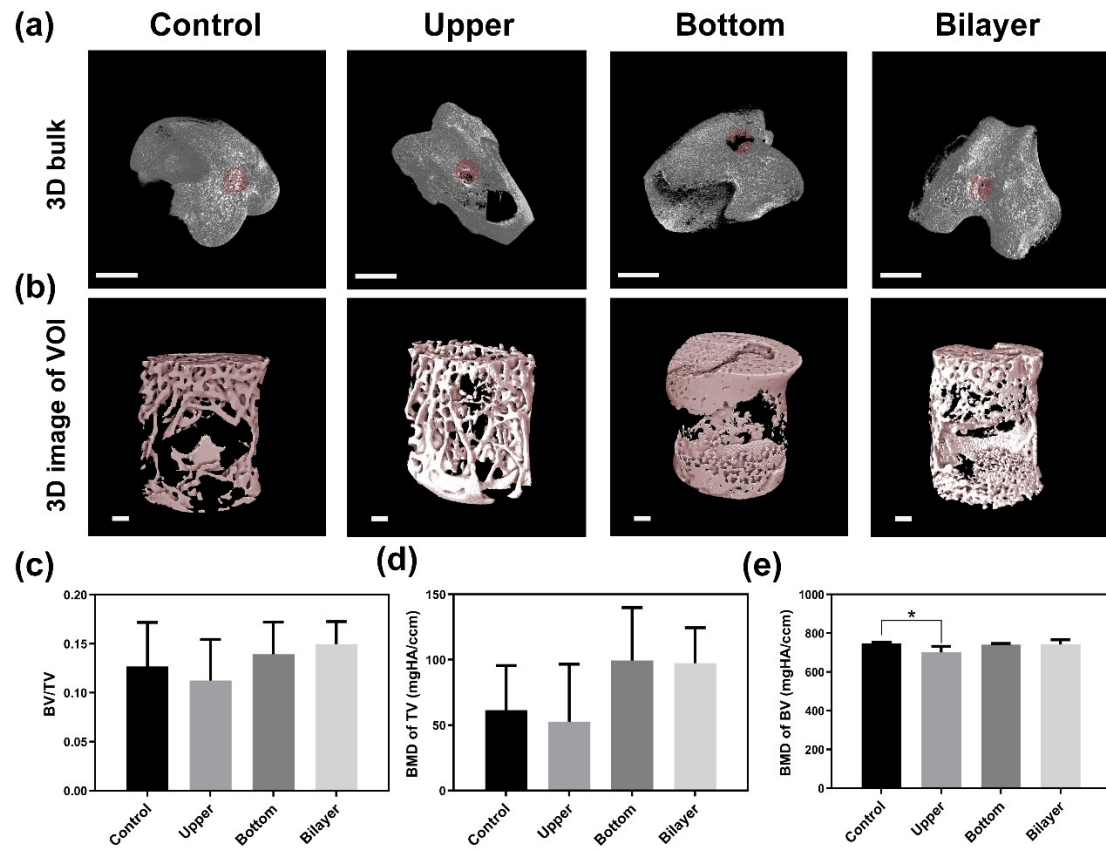

**Figure S10.** (a) 3D reconstruction of samples for different groups (implantation area is colored red, scale bar: 5 mm). (b) The reconstructed VOI images of defect area for different groups (scale bar: 500  $\mu$ m). (c) Bone volume/total volume (BV/TV), (d) bone mineral density of total volume (BMD of TV) and (e) bone mineral density of bone volume (BMD of BV) calculated from Micro-CT results (n=4). Significances ( $p < 0.5$ ,  $p < 0.01$  and  $p < 0.001$ ) were suggested as asterisks (\*, \*\* and \*\*\*).

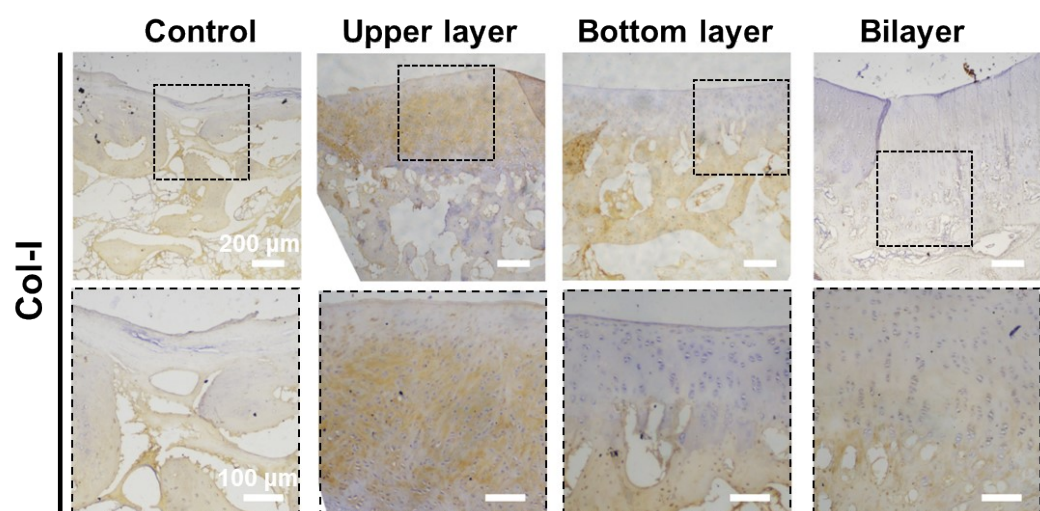

**Figure S11.** Col-I stain of collected knee joints after 6 weeks of implantation (scale bar: 200  $\mu\text{m}$  and 100  $\mu\text{m}$ ).

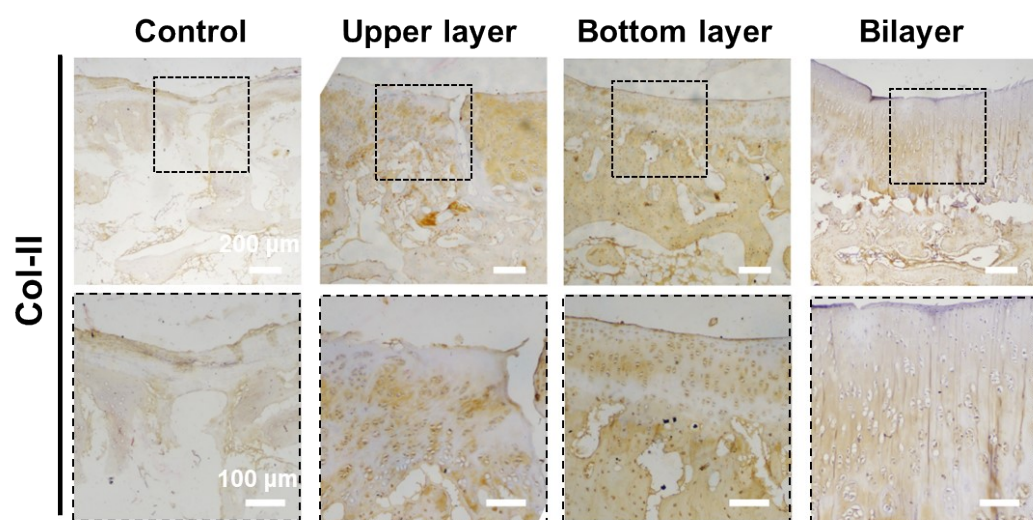

**Figure S12.** Col-II stain of collected knee joints after 6 weeks of implantation (scale bar: 200  $\mu\text{m}$  and 100  $\mu\text{m}$ ).
